# Supplementary material for: A new iron oxyselenide Ce2O2FeSe2: synthesis and characterisation
Source: Royal Society of Chemistry journal article supplement (doi:10.1039/c0cc03477k), 2010-11-22
Supplement: c0cc03477k.pdf [file c0cc03477k.pdf]

## Supplementary Information

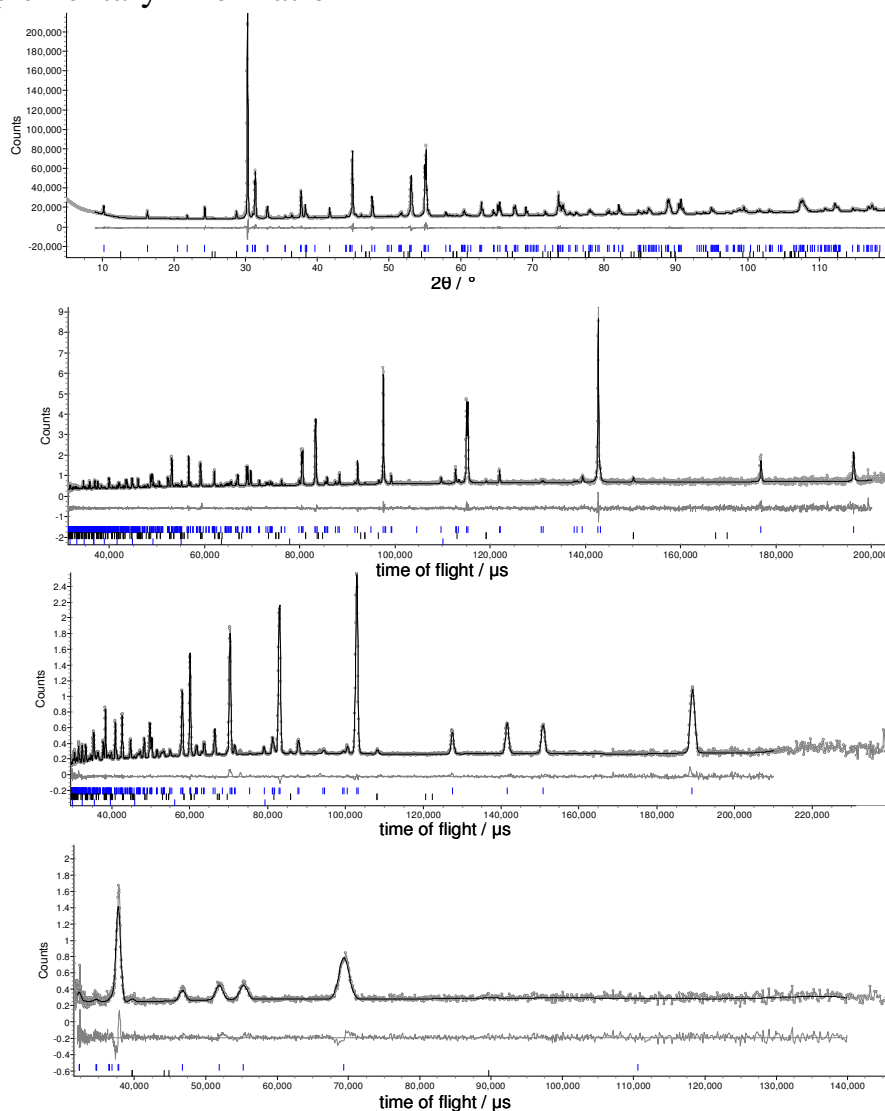

- S1. Rietveld refinement profiles from combined refinement using 295 K a) XRPD data, b) backscattered NPD data, c)  $90^\circ$  NPD data and d)  $30^\circ$  NPD data for  $\text{Ce}_2\text{O}_2\text{FeSe}_2$  with observed and calculated patterns shown in grey and black, respectively; difference profile shown below in grey, peak positions shown with vertical tick marks for  $\text{Ce}_2\text{O}_2\text{FeSe}_2$  (directly below profile),  $\text{Ce}_2\text{O}_2\text{Se}$  (second from top) and vanadium (bottom, NPD refinements only).

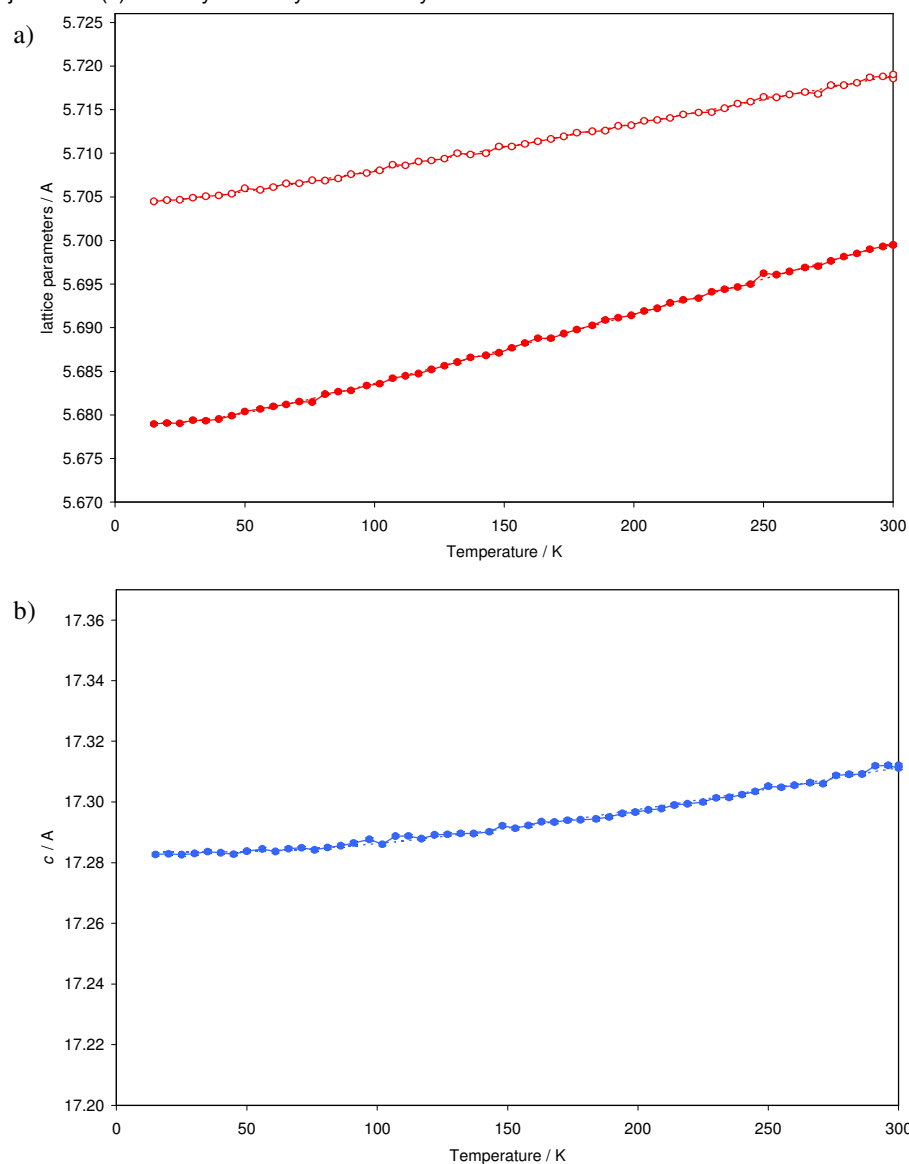

S2. Plots of unit cell parameters as a function of temperature determined from sequential Rietveld refinements using XRPD data a)  $a$  and  $b$  lattice parameters shown with closed and open points, respectively and b)  $c$  lattice parameter. Thermal expansion was modelled using

$$\ln \left[ \frac{a_T}{a_0} \right] = \frac{C_i \theta_i}{\exp\left(\frac{\theta_i}{T}\right) - 1}$$

where  $a_T$  is the  $a$  lattice parameter at temperature  $T$ ,

$a_0$  is the  $a$  lattice parameter at 0 K,  $C_i$  a constant and  $\theta_i$  the Einstein temperature. Einstein temperatures are 110(4) K, 89(6) K and 280(15) K for  $a$ ,  $b$  and  $c$ , respectively, corresponding to increases of 0.36%, 0.26%, 0.17% and 0.79% in  $a$ ,  $b$ ,  $c$  and volume, respectively.

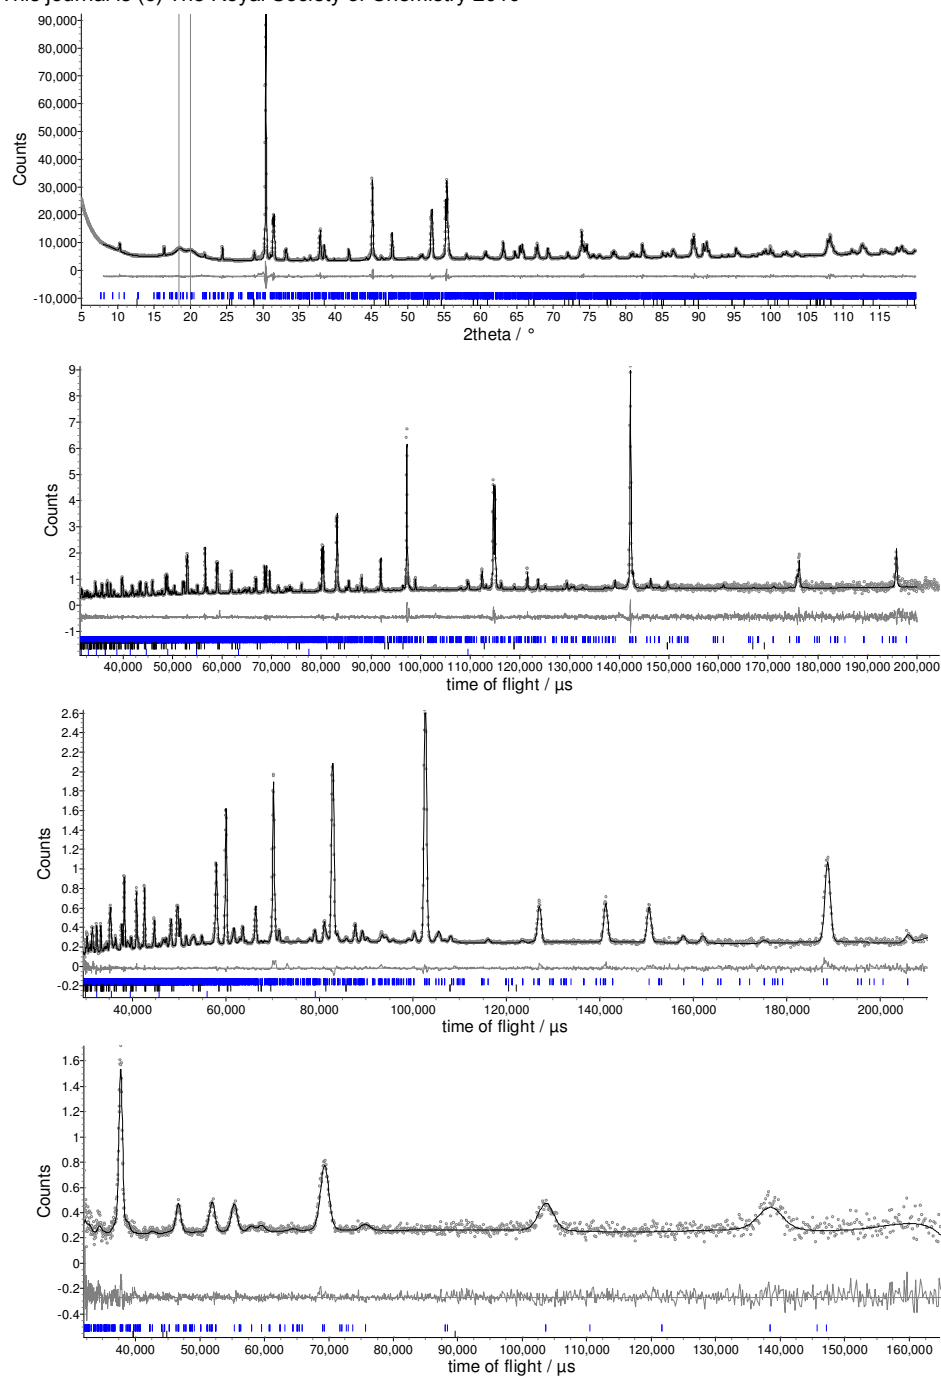

- S3. Rietveld refinement profiles from combined refinement using 12 K a) XRPD data, b) backscattered NPD data, c) 90° NPD data and d) 30° NPD data for  $\text{Ce}_2\text{O}_2\text{FeSe}_2$  with observed and calculated patterns shown in grey and black, respectively; difference profile shown below in grey, peak positions shown with vertical tick marks for  $\text{Ce}_2\text{O}_2\text{FeSe}_2$  (directly below profile),  $\text{Ce}_2\text{O}_2\text{Se}$  (second from top) and vanadium (bottom, NPD refinements only).

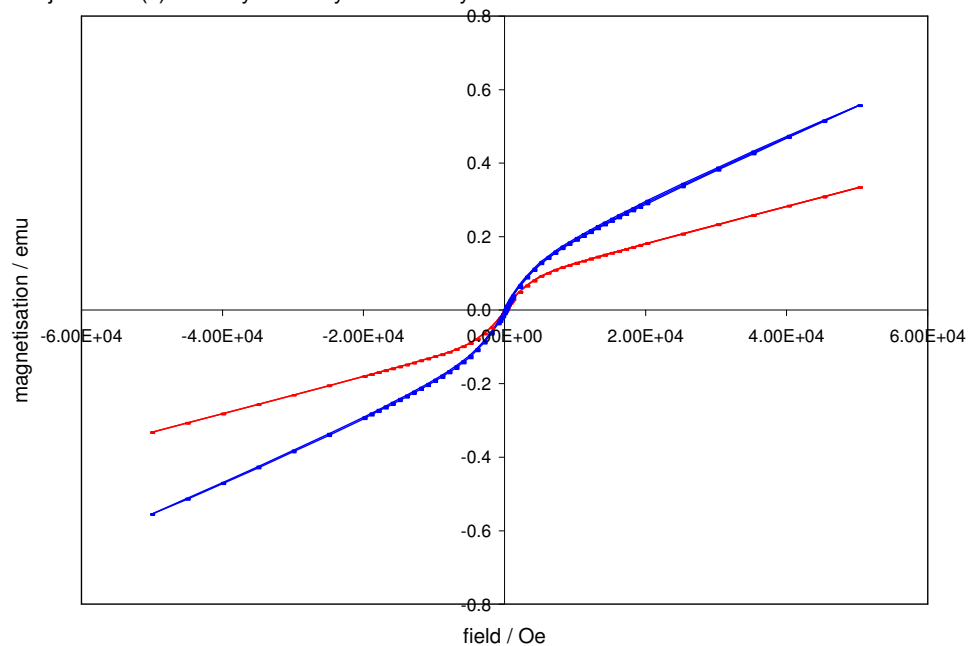

S4. Plots of magnetization versus field for  $\text{Ce}_2\text{O}_2\text{SeFe}_2$  at 295 K (red) and 12 K (blue).

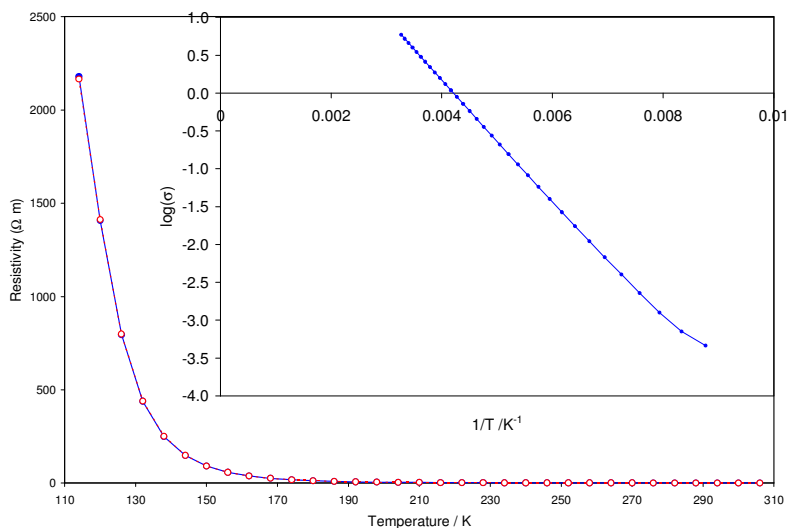

S5. a) Electrical resistivity of  $\text{Ce}_2\text{O}_2\text{FeSe}_2$  as a function of temperature and inset, Arrhenius plot of  $\log(\text{conductivity})$  versus reciprocal temperature, with data collected on cooling (blue, closed points) and on warming (red, open points).
